# Supplementary material for: Investigation of Summertime Ozone Formation and Sources of Volatile Organic Compounds in the Suburb Area of Hefei: A Case Study of 2020
Source: MDPI journal article supplement (doi:10.3390/atmos14040740), 2023-04-19
Supplement: s1 [file s1]

Archive with 1 entries (1 files):
- atmosphere-2331025-supplementary.pdf
