# Supplementary material for: Investigation of Summertime Ozone Formation and Sources of Volatile Organic Compounds in the Suburb Area of Hefei: A Case Study of 2020
Source: MDPI journal article supplement (doi:10.3390/atmos14040740), 2023-04-19
Supplement: s1 [file s1 › atmosphere-2331025-supplementary.pdf]

# Investigation of Summertime Ozone Formation and Sources of Volatile Organic Compounds in the Suburb Area of Hefei: A Case Study of 2020

Hui Yu <sup>1,2</sup>, Qianqian Liu <sup>2,3</sup>, Nana Wei <sup>1,\*</sup>, Mingfeng Hu <sup>1</sup>, Xuezhe Xu <sup>1</sup>, Shuo Wang <sup>1</sup>, Jiacheng Zhou <sup>1</sup>, Weixiong Zhao <sup>1</sup> and Weijun Zhang <sup>1,3,\*</sup>

- <sup>1</sup> Laboratory of Atmospheric Physico-Chemistry, Anhui Institute of Optics and Fine Mechanics, HFIPS, Chinese Academy of Sciences, Hefei 230031, China; huiyu@mail.ustc.edu.cn (H.Y.); mfhhu@aiofm.ac.cn (M.H.); xzxu@aiofm.ac.cn (X.X.); wangs@aiofm.ac.cn (S.W.); zhoujch@aiofm.ac.cn (J.Z.); wxzhao@aiofm.ac.cn (W.Z.)
- <sup>2</sup> Science Island Branch, Graduate School, University of Science and Technology of China, Hefei 230026, China; lqqwqs@mail.ustc.edu.cn
- <sup>3</sup> School of Environmental Science and Optoelectronics Technology, University of Science and Technology of China, Hefei 230026, China
- \* Correspondence: weinn@aiofm.ac.cn (N.W.); wjzhang@aiofm.ac.cn (W.Z.)

## Text S1. Analytical process for GC-MS/FID.

A 400 mL air sample from each canister was pumped into the preconcentrator (7200, Entech Instruments Inc., Simi Valley, CA, USA), equipped with three-stage cryotrap. In this process, water and carbon dioxide in the air sample were removed, and the sample was concentrated. Then the sample was injected into a gas chromatograph coupled with a mass selective detector and a flame ionization detector (TSQ 9000, Thermo Instruments Inc., Waltham, MA, USA). The C<sub>2</sub> ~ C<sub>3</sub> hydrocarbons were measured by the flame ionization detector (FID) channel with a TG BOND Q+ capillary column (30 m × 0.32 mm × 10 μm) (Thermo Instruments Inc., Waltham, MA, USA). The other VOC species were separated using the mass spectrometer detector (MSD) channel with a TG-624SilM capillary column (30 m × 0.53 mm × 3.0 μm) (Thermo Instruments Inc., Waltham, MA, USA). The gas chromatography temperature program was as follows: 40 °C (3 min); 40 °C to 90 °C at a rate of 3 °C min<sup>-1</sup>; 90 °C to 130 °C at a rate of 15 °C min<sup>-1</sup>; 130 °C to 200 °C at a rate of 5 °C min<sup>-1</sup>; 200 °C (5 min).

The internal standard compounds (1.25 ppb) were acquired by diluting a standard gas (5 ppb) (Linde Electronics and Specialty Gases Inc., Danbury, CT, USA) comprising four species (bromochloromethane, 1,4-difluorobenzene, chlorobenzene-d<sub>5</sub>, and p-bromofluorobenzene). Five-point mixing ratio calibration curves ranging from 1 ppb to 7.5 ppb were established. The linear coefficients (*R*<sup>2</sup>) of the standard curves for most of the species were above 0.99 (Table S1). The calibration curves were adjusted each day with a standard sample of 2 ppb, and the differences between the results and the corresponding values on the calibration curves should not exceed ± 30%. Otherwise, the curves were re-established.

## Text S2. Detail procedure for positive matrix factorization (PMF).

The PMF model requires two input files, including a matrix of the concentrations (Conc) of VOC species and a matrix of concentration uncertainties (Unc). The uncertainty, Unc, is calculated by equations (1) and (2) as follows:

**Citation:** Yu, H.; Liu, Q.; Wei, N.; Hu, M.; Xu, X.; Wang, S.; Zhou, J.; Zhao, W.; Zhang, W. Investigation of Summertime Ozone Formation and Sources of Volatile Organic Compounds in the Suburb Area of Hefei: A Case Study of 2020. *Atmosphere* **2023**, *14*, 740. <https://doi.org/10.3390/atmos14040740>

Academic Editors: Lei Sun, Chen Wang and Leifeng Yang

Received: 23 March 2023

Revised: 13 April 2023

Accepted: 15 April 2023

Published: 19 April 2023

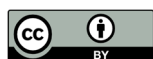

**Copyright:** © 2023 by the authors. Licensee MDPI, Basel, Switzerland. This article is an open access article distributed under the terms and conditions of the Creative Commons Attribution (CC BY) license (<https://creativecommons.org/licenses/by/4.0/>).

$$Unc = \sqrt{(EF \times x_{ij})^2 + (0.5 \times MDL)^2} \quad (1)$$

$$Unc = \frac{5}{6} \times MDL \quad (2)$$

where  $EF$  represents the error fraction (%) of each species.  $x_{ij}$  is the species concentration (ppb), and  $MDL$  is the method detection limit (ppb). If the concentration exceeds the  $MDL$ , its uncertainty is calculated using equation (1). Suppose the concentration is less than or equal to the  $MDL$ . In that case, its uncertainty is calculated with equation (2), and the corresponding concentration is replaced by the value equal to half the  $MDL$ . Missing values were replaced by the median concentration of a species, with an uncertainty of four times the median [1,2].

Different factors were tested to obtain the optimal number of sources for the PMF solution. Each test executed 20 base runs to check the solution stability and the lowest  $Q$  value was selected as the base runtime solution. The  $Q_{true}/Q_{exp}$  values decreased gradually with an increasing number of factors. When the factor number increased to 7, the decrease in the amplitude became insignificant. Therefore, the factor number was determined as 7 after comparing the  $Q_{true}/Q_{exp}$  values.

The recommended ratio of  $Q(ture)/Q(robust)$  is less than 1.5. A ratio close to 1 is considered reliable [3,4]. In this study, the seven factors exhibited an acceptable  $Q(ture)/Q(robust)$  ratio of 1.00. The correlation coefficient ( $R^2$ ) between the observed and predicted values of TVOCs for this solution was 0.95. High correlations were also found between the observed and predicted values of VOC species. The bootstrap method was used to evaluate the stability and rationality of the base run solution. The minimum correlation  $R^2$  was set at 0.6, and 100 bootstrap runs were performed. All factors were mapped to more than 87% (Table S2), indicating that the base run solution was reasonable.

**Text S3.** The introduction of different VOC sources.

Factor 1 was identified as the combustion source, characterized by high proportions of low carbon alkanes, such as ethane (58.7%) and propane (43.1%), as well as halogenated hydrocarbons, such as chloromethane (31.9%) and chloroform (38%). Furthermore, the combustion process generates many short-chain and long-chain hydrocarbons, such as ethane and propane [5,6]. Chloromethane and chloroform are the markers of biomass combustion [7]. Thus, this source was identified as a combustion source.

Factor 2 was identified as the biogenic emission, characterized by high isoprene percentages. As the typical tracer for biogenic emission [8], isoprene showed good consistency with the diurnal profiles of temperature and solar radiation as shown in Figure S1. Hence, this source was identified as biogenic emission.

Factor 3 was identified as the fuel evaporation, characterized by high percentages of  $C_3 \sim C_5$  alkanes with the contributions of *i*-butane, *n*-butane, *i*-pentane, and *n*-pentane of 29.2%, 27%, 44.5%, and 57.6%, respectively, which are the tracers of gasoline fuel evaporation [9]. Therefore, factor 3 was ascertained as fuel evaporation.

Factor 4 was rich in aromatic compounds, including ethylbenzene (47.9%), *m/p*-xylene (74.5%), and *o*-xylene (51.8%). The high abundances of these species strongly imply the solvent use source [10]. Here, factor 4 can be labeled as solvent utilization.

In factor 5, halogenated hydrocarbons have a dominant percentage. The contributions of dichloromethane, 1,2-dichloropropane, chloroform, and chlorobenzene were 51.5%, 59.5%, 33%, and 84%, respectively, with notable contributions of toluene (35.5%), ethylbenzene (36%), and *o*-xylene (38.1%). Dichloromethane, 1,2-dichloropropane, chloroform, and chlorobenzene are the important markers of industrial processes [11], while toluene, ethylbenzene, and *o*-xylene are emitted mainly by industrial production [12]. Therefore, factor 5 was identified as an industrial source.

Factor 6 was identified as vehicular emission, and was characterized by high proportions of alkenes, such as ethylene (52%), 1-butene (46.6%), and propylene (54.3%), which are the important indicators of vehicle exhaust [11]. In addition, propane (20.3%), *i*-pentane (20.3%), *n*-pentane (22.5%), 2-methylpentane (20.5%), and benzene (34.7%) also have relatively high proportions, of which C<sub>3</sub> ~ C<sub>6</sub> alkanes and benzene are the tracers of vehicle exhaust emissions. These species are considered typical products of incomplete combustion processes [10]. Thus, factor 6 was defined as a vehicular emission.

Factor 7 was enriched with halogenated hydrocarbons, mainly including methyl chloride (18%), dichloromethane (16.3%), and 1,2-dichloroethane (18%). These chemicals are typically emitted by industrial emissions [11], have a long lifetime in the atmosphere, and can be transported over long distances. This source also includes high concentrations of OVOCs, such as acetone (67.3%), 2-butanone (74.3%), and isopropanol (51%), which can be from the solvent usage and industrial production, as well as from the oxidation of VOCs [13]. As shown in Figure 4, the average X/E ratio during the observation period was 1.11, implying a high level of air mass aging and active photochemical reactions. The VOC source distribution in Zhengzhou had a similar characteristic [14]. As a result, factor 7 was defined as an aged air mass.

**Table S1.** The species information of VOCs measured at the AIOFM site.

| VOC species            | CAS number | Molecular formula              | R <sup>2</sup> <sup>1</sup> |
|------------------------|------------|--------------------------------|-----------------------------|
| <i>Alkanes</i>         |            |                                |                             |
| Ethane                 | 74-84-0    | C <sub>2</sub> H <sub>6</sub>  | 0.9964                      |
| Propane                | 74-98-6    | C <sub>3</sub> H <sub>8</sub>  | 0.9526                      |
| <i>i</i> -Butane       | 75-28-5    | C <sub>4</sub> H <sub>10</sub> | 0.9590                      |
| <i>n</i> -Butane       | 106-97-8   | C <sub>4</sub> H <sub>10</sub> | 0.9842                      |
| <i>i</i> -Pentane      | 78-78-4    | C <sub>5</sub> H <sub>12</sub> | 0.9996                      |
| <i>n</i> -Pentane      | 109-66-0   | C <sub>5</sub> H <sub>12</sub> | 0.9992                      |
| 2,2-Dimethylbutane     | 75-83-2    | C <sub>6</sub> H <sub>14</sub> | 0.9989                      |
| 2,3-Dimethylbutane     | 79-29-8    | C <sub>6</sub> H <sub>14</sub> | 0.9987                      |
| Cyclopentane           | 287-92-3   | C <sub>5</sub> H <sub>10</sub> | 0.9986                      |
| 2-Methylpentane        | 107-83-5   | C <sub>6</sub> H <sub>14</sub> | 0.9992                      |
| 3-Methylpentane        | 96-14-0    | C <sub>6</sub> H <sub>14</sub> | 0.9994                      |
| <i>n</i> -Hexane       | 110-54-3   | C <sub>6</sub> H <sub>14</sub> | 0.9991                      |
| 2,4-Dimethylpentane    | 108-08-7   | C <sub>7</sub> H <sub>16</sub> | 0.9991                      |
| Methylcyclopentane     | 96-37-7    | C <sub>6</sub> H <sub>12</sub> | 0.9977                      |
| 2-Methylhexane         | 591-76-4   | C <sub>7</sub> H <sub>16</sub> | 0.9992                      |
| Cyclohexane            | 110-82-7   | C <sub>6</sub> H <sub>12</sub> | 0.9974                      |
| 2,3-Dimethylpentane    | 565-59-3   | C <sub>7</sub> H <sub>16</sub> | 0.9983                      |
| 3-Methylhexane         | 589-34-4   | C <sub>7</sub> H <sub>16</sub> | 0.9990                      |
| 2,2,4-Trimethylpentane | 540-84-1   | C <sub>8</sub> H <sub>18</sub> | 0.9985                      |
| <i>n</i> -Heptane      | 142-82-5   | C <sub>7</sub> H <sub>16</sub> | 0.9981                      |
| Methylcyclohexane      | 108-87-2   | C <sub>7</sub> H <sub>14</sub> | 0.9991                      |
| 2,3,4-Trimethylpentane | 565-75-3   | C <sub>8</sub> H <sub>18</sub> | 0.9979                      |
| 2-Methylheptane        | 592-27-8   | C <sub>8</sub> H <sub>18</sub> | 0.9989                      |
| 3-Methylheptane        | 589-81-1   | C <sub>8</sub> H <sub>18</sub> | 0.9996                      |

|                                   |            |                                               |        |
|-----------------------------------|------------|-----------------------------------------------|--------|
| Octane                            | 111-65-9   | C <sub>8</sub> H <sub>18</sub>                | 0.9992 |
| <i>n</i> -Nonane                  | 111-84-2   | C <sub>9</sub> H <sub>20</sub>                | 0.9992 |
| <i>n</i> -Decane                  | 124-18-5   | C <sub>10</sub> H <sub>22</sub>               | 0.9992 |
| Undecane                          | 1120-21-4  | C <sub>11</sub> H <sub>24</sub>               | 0.9996 |
| Dodecane                          | 112-40-3   | C <sub>12</sub> H <sub>26</sub>               | 0.9998 |
| <b><i>Alkenes</i></b>             |            |                                               |        |
| Ethene                            | 74-85-1    | C <sub>2</sub> H <sub>4</sub>                 | 0.9185 |
| Propene                           | 115-07-1   | C <sub>3</sub> H <sub>6</sub>                 | 0.9939 |
| 1-Butene                          | 106-98-9   | C <sub>4</sub> H <sub>8</sub>                 | 0.9818 |
| 1,3-Butadiene                     | 106-99-0   | C <sub>4</sub> H <sub>6</sub>                 | 0.9953 |
| <i>trans</i> -2-Butene            | 624-64-6   | C <sub>4</sub> H <sub>8</sub>                 | 0.9959 |
| <i>cis</i> -2-Butene              | 590-18-1   | C <sub>4</sub> H <sub>8</sub>                 | 0.9989 |
| 1-Pentene                         | 109-67-1   | C <sub>5</sub> H <sub>10</sub>                | 0.9980 |
| <i>trans</i> -2-Pentene           | 646-04-8   | C <sub>5</sub> H <sub>10</sub>                | 0.9975 |
| Isoprene                          | 78-79-5    | C <sub>5</sub> H <sub>8</sub>                 | 0.9977 |
| <i>cis</i> -2-Pentene             | 627-20-3   | C <sub>5</sub> H <sub>10</sub>                | 0.9974 |
| 1-Hexene                          | 592-41-6   | C <sub>6</sub> H <sub>12</sub>                | 0.9987 |
| <b><i>Alkyne</i></b>              |            |                                               |        |
| Acetylene                         | 74-86-2    | C <sub>2</sub> H <sub>2</sub>                 | 0.9941 |
| <b><i>Halocarbons</i></b>         |            |                                               |        |
| Freon12                           | 75-71-8    | CCl <sub>2</sub> F <sub>2</sub>               | 0.9330 |
| Freon114                          | 76-14-2    | C <sub>2</sub> Cl <sub>2</sub> F <sub>4</sub> | 0.9223 |
| Chloromethane                     | 74-87-3    | CH <sub>3</sub> Cl                            | 0.9567 |
| Vinyl chloride                    | 75-01-4    | C <sub>2</sub> H <sub>3</sub> Cl              | 0.9700 |
| Bromomethane                      | 74-83-9    | CH <sub>3</sub> Br                            | 0.9987 |
| Chloroethane                      | 75-00-3    | C <sub>2</sub> H <sub>5</sub> Cl              | 0.9986 |
| Freon11                           | 75-69-4    | CFCl <sub>3</sub>                             | 0.9996 |
| 1,1-Dichloroethylene              | 75-35-4    | C <sub>2</sub> H <sub>2</sub> Cl <sub>2</sub> | 0.9982 |
| Freon113                          | 76-13-1    | C <sub>2</sub> F <sub>3</sub> Cl <sub>3</sub> | 0.9996 |
| Dichloromethane                   | 75-09-2    | CH <sub>2</sub> Cl <sub>2</sub>               | 0.9961 |
| <i>trans</i> -1,2-Dichloroethene  | 156-60-5   | C <sub>2</sub> H <sub>2</sub> Cl <sub>2</sub> | 0.9988 |
| 1,1-Dichloroethane                | 75-34-3    | C <sub>2</sub> H <sub>4</sub> Cl <sub>2</sub> | 0.9991 |
| <i>cis</i> -1,2-Dichloroethylene  | 156-59-2   | C <sub>2</sub> H <sub>2</sub> Cl <sub>2</sub> | 0.9988 |
| Chloroform                        | 67-66-3    | CHCl <sub>3</sub>                             | 0.9996 |
| 1,1,1-Trichloroethane             | 71-55-6    | C <sub>2</sub> H <sub>3</sub> Cl <sub>3</sub> | 0.9989 |
| Tetrachloromethane                | 56-23-5    | CCl <sub>4</sub>                              | 0.9988 |
| 1,2-Dichloroethane                | 107-06-2   | C <sub>2</sub> H <sub>4</sub> Cl <sub>2</sub> | 0.9993 |
| 1,2-Dichloropropane               | 78-87-5    | C <sub>3</sub> H <sub>6</sub> Cl <sub>2</sub> | 0.9992 |
| Bromodichloromethane              | 75-27-4    | CHBrCl <sub>2</sub>                           | 0.9984 |
| <i>trans</i> -1,3-Dichloropropene | 10061-02-6 | C <sub>3</sub> H <sub>4</sub> Cl <sub>2</sub> | 0.9993 |
| <i>cis</i> -1,3-Dichloropropene   | 10061-01-5 | C <sub>3</sub> H <sub>4</sub> Cl <sub>2</sub> | 0.9976 |

|                           |           |                                               |        |
|---------------------------|-----------|-----------------------------------------------|--------|
| 1,1,2-Trichloroethane     | 79-00-5   | C <sub>2</sub> H <sub>3</sub> Cl <sub>3</sub> | 0.9990 |
| Tetrachloroethylene       | 127-18-4  | C <sub>2</sub> Cl <sub>4</sub>                | 0.9987 |
| Dibromochloromethane      | 124-48-1  | CHBr <sub>2</sub> Cl                          | 0.9979 |
| 1,2-Dibromoethane         | 106-93-4  | C <sub>2</sub> H <sub>4</sub> Br <sub>2</sub> | 0.9983 |
| Trichloroethylene         | 79-01-6   | C <sub>2</sub> HCl <sub>3</sub>               | 0.9988 |
| Chlorobenzene             | 108-90-7  | C <sub>6</sub> H <sub>5</sub> Cl              | 0.9984 |
| Bromoform                 | 75-25-2   | CHBr <sub>3</sub>                             | 0.9975 |
| 1,1,2,2-Tetrachloroethane | 79-34-5   | C <sub>2</sub> H <sub>2</sub> Cl <sub>4</sub> | 0.9991 |
| 1,3-Dichlorobenzene       | 541-73-1  | C <sub>6</sub> H <sub>4</sub> Cl <sub>2</sub> | 0.9972 |
| 1,4-Dichlorobenzene       | 106-46-7  | C <sub>6</sub> H <sub>4</sub> Cl <sub>2</sub> | 0.9971 |
| Benzyl chloride           | 100-44-7  | C <sub>7</sub> H <sub>7</sub> Cl              | 0.9961 |
| 1,2-Dichlorobenzene       | 95-50-1   | C <sub>6</sub> H <sub>4</sub> Cl <sub>2</sub> | 0.9972 |
| 1,2,4-Trichlorobenzene    | 120-82-1  | C <sub>6</sub> H <sub>3</sub> Cl <sub>3</sub> | 0.9982 |
| Hexachloro-1,3-butadiene  | 87-68-3   | C <sub>4</sub> Cl <sub>6</sub>                | 0.9940 |
| <b>OVOCs</b>              |           |                                               |        |
| Acetaldehyde              | 75-07-0   | C <sub>2</sub> H <sub>4</sub> O               | 0.9869 |
| Acrolein                  | 107-02-8  | C <sub>3</sub> H <sub>4</sub> O               | 0.9964 |
| Propanal                  | 123-38-6  | C <sub>3</sub> H <sub>6</sub> O               | 0.9987 |
| Acetone                   | 67-64-1   | C <sub>3</sub> H <sub>6</sub> O               | 0.9977 |
| Isopropanol               | 67-63-0   | C <sub>3</sub> H <sub>8</sub> O               | 0.9991 |
| MTBE                      | 1634-04-4 | C <sub>5</sub> H <sub>12</sub> O              | 0.9995 |
| Methacrolein              | 78-85-3   | C <sub>4</sub> H <sub>6</sub> O               | 0.9983 |
| Vinyl acetate             | 108-05-4  | C <sub>4</sub> H <sub>6</sub> O <sub>2</sub>  | 0.9988 |
| 2-Butanone                | 78-93-3   | C <sub>4</sub> H <sub>8</sub> O               | 0.9995 |
| Butanal                   | 123-72-8  | C <sub>4</sub> H <sub>8</sub> O               | 0.9987 |
| Ethyl acetate             | 141-78-6  | C <sub>4</sub> H <sub>8</sub> O <sub>2</sub>  | 0.9991 |
| <i>trans</i> -2-Butenal   | 123-73-9  | C <sub>4</sub> H <sub>6</sub> O               | 0.9945 |
| Pentanal                  | 110-62-3  | C <sub>5</sub> H <sub>10</sub> O              | 0.9997 |
| Methyl methacrylate       | 80-62-6   | C <sub>5</sub> H <sub>8</sub> O <sub>2</sub>  | 0.9990 |
| 4-Methyl-2-pentanone      | 108-10-1  | C <sub>6</sub> H <sub>12</sub> O              | 0.9987 |
| 2-Hexanone                | 591-78-6  | C <sub>6</sub> H <sub>12</sub> O              | 0.9979 |
| Hexanal                   | 66-25-1   | C <sub>6</sub> H <sub>12</sub> O              | 0.9981 |
| Benzaldehyde              | 100-52-7  | C <sub>7</sub> H <sub>6</sub> O               | 0.9992 |
| 3-Methylbenzaldehyde      | 620-23-5  | C <sub>8</sub> H <sub>8</sub> O               | 0.9933 |
| Tetrahydrofuran           | 109-99-9  | C <sub>4</sub> H <sub>8</sub> O               | 0.9994 |
| 1,4-Dioxane               | 123-91-1  | C <sub>4</sub> H <sub>8</sub> O <sub>2</sub>  | 0.9985 |
| <b>Aromatics</b>          |           |                                               |        |
| Benzene                   | 71-43-2   | C <sub>6</sub> H <sub>6</sub>                 | 0.9983 |
| Toluene                   | 108-88-3  | C <sub>7</sub> H <sub>8</sub>                 | 0.9984 |
| Ethylbenzene              | 100-41-4  | C <sub>8</sub> H <sub>10</sub>                | 0.9982 |
| <i>m/p</i> -Xylene        | 106-42-3  | C <sub>8</sub> H <sub>10</sub>                | 0.9991 |

|                          |          |                                 |        |
|--------------------------|----------|---------------------------------|--------|
| <i>o</i> -Xylene         | 95-47-6  | C <sub>8</sub> H <sub>10</sub>  | 0.9987 |
| Styrene                  | 100-42-5 | C <sub>8</sub> H <sub>8</sub>   | 0.9992 |
| Isopropyl benzene        | 98-82-8  | C <sub>9</sub> H <sub>12</sub>  | 0.9991 |
| <i>n</i> -Propyl benzene | 103-65-1 | C <sub>9</sub> H <sub>12</sub>  | 0.9996 |
| 4-Ethyltoluene           | 622-96-8 | C <sub>9</sub> H <sub>12</sub>  | 0.9997 |
| 3-Ethyltoluene           | 620-14-4 | C <sub>9</sub> H <sub>12</sub>  | 0.9997 |
| 1,3,5-Trimethylbenzene   | 108-67-8 | C <sub>9</sub> H <sub>12</sub>  | 0.9985 |
| 2-Ethyltoluene           | 611-14-3 | C <sub>9</sub> H <sub>12</sub>  | 0.9983 |
| 1,2,4-Trimethylbenzene   | 95-63-6  | C <sub>9</sub> H <sub>12</sub>  | 0.9985 |
| 1,2,3-Trimethylbenzene   | 526-73-8 | C <sub>9</sub> H <sub>12</sub>  | 0.9993 |
| 1,4-Diethylbenzene       | 105-05-5 | C <sub>10</sub> H <sub>14</sub> | 0.9984 |
| 1,3-Diethylbenzene       | 141-93-5 | C <sub>10</sub> H <sub>14</sub> | 0.9980 |
| Naphthalene              | 91-20-3  | C <sub>10</sub> H <sub>8</sub>  | 0.9998 |
| <i>Sulfide</i>           |          |                                 |        |
| Carbon disulfide         | 75-15-0  | CS <sub>2</sub>                 | 0.9969 |

<sup>1</sup> The correlation coefficients ( $R^2$ ) of calibration curves for VOC species.

**Table S2.** The results of base bootstrap at the AIOFM site.

|               | Factor 1 | Factor 2 | Factor 3 | Factor 4 | Factor 5 | Factor 6 | Factor 7 | Unmapped |
|---------------|----------|----------|----------|----------|----------|----------|----------|----------|
| Boot Factor 1 | 100      | 0        | 0        | 0        | 0        | 0        | 0        | 0        |
| Boot Factor 2 | 0        | 100      | 0        | 0        | 0        | 0        | 0        | 0        |
| Boot Factor 3 | 0        | 0        | 99       | 1        | 0        | 0        | 0        | 0        |
| Boot Factor 4 | 0        | 0        | 0        | 100      | 0        | 0        | 0        | 0        |
| Boot Factor 5 | 1        | 0        | 0        | 1        | 97       | 1        | 0        | 0        |
| Boot Factor 6 | 1        | 0        | 4        | 2        | 4        | 87       | 2        | 0        |
| Boot Factor 7 | 0        | 0        | 2        | 1        | 0        | 0        | 97       | 0        |

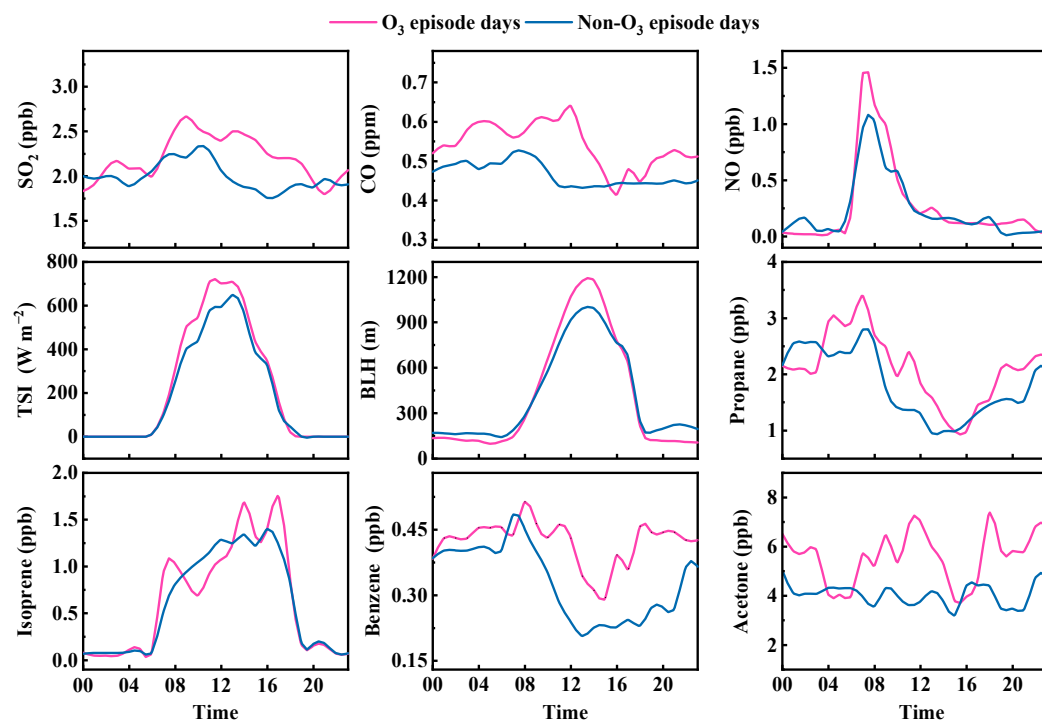

**Figure S1.** Diurnal variations of SO<sub>2</sub>, CO, NO, total solar irradiance (TSI), boundary layer height (BLH), propane, isoprene, benzene, and acetone during the non-O<sub>3</sub> and O<sub>3</sub> episode days. The boundary layer height in Hefei was retrieved from the European Centre for Medium-Range Weather Forecasts model results (<https://www.ecmwf.int/en/forecasts/datasets>), accessed on 1 October 2020.

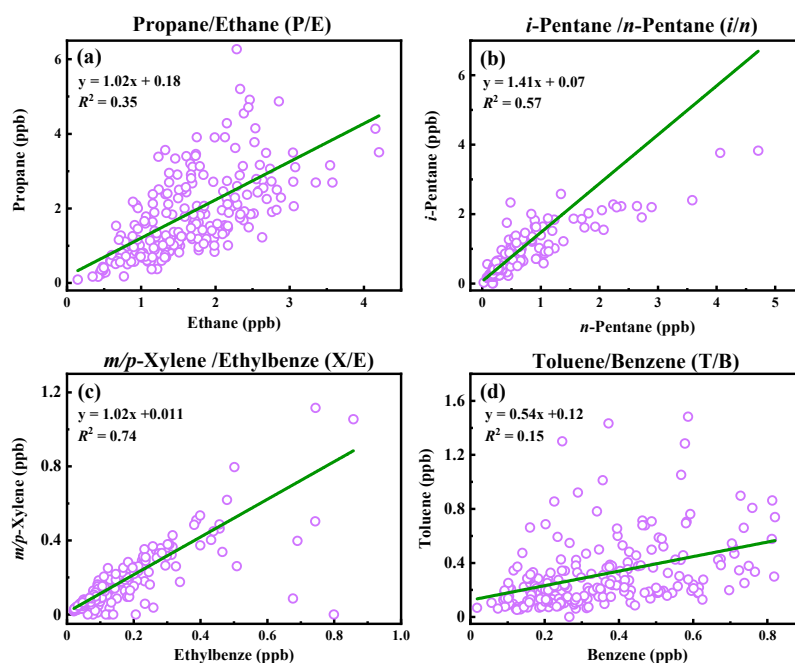

**Figure S2.** Linear correlations ( $R^2$ ) between (a) propane/ethane, (b) *i*-pentane/*n*-pentane, (c) *m/p*-xylene/*o*-xylene, (d) toluene/benzene during the observation period.

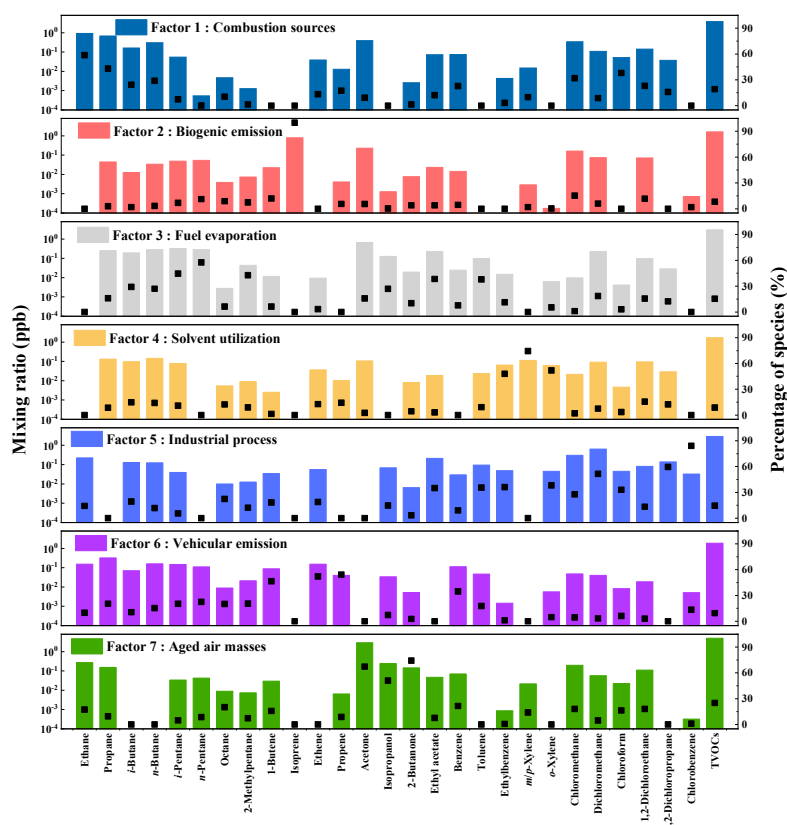

**Figure S3.** Source profiles and contribution percentages from each source during the observation period by the PMF model. The bar is a mixing ratio, and the dot is a percentage.

## References

- Norris, G.; Duvall, R. *EPA Positive Matrix Factorization (PMF) 5.0 Fundamentals and User Guide*; U.S. Environmental Protection Agency Office of Research and Development: Washington, DC, USA, 2014.
- Shao, P.; An, J.; Xin, J.; Wu, F.; Wang, J.; Ji, D.; Wang, Y. Source apportionment of VOCs and the contribution to photochemical ozone formation during summer in the typical industrial area in the Yangtze River Delta, China. *Atmos. Res.* **2016**, *176*, 64–74. <https://doi.org/10.1016/j.atmosres.2016.02.015>.
- Hui, L.; Liu, X.; Tan, Q.; Feng, M.; An, J.; Qu, Y.; Zhang, Y.; Cheng, N. VOC characteristics, sources and contributions to SOA formation during haze events in Wuhan, Central China. *Sci. Total Environ.* **2019**, *650*, 2624–2639. <https://doi.org/10.1016/j.scitotenv.2018.10.029>.
- Song, M.; Li, X.; Yang, S.; Yu, X.; Zhou, S.; Yang, Y.; Chen, S.; Dong, H.; Liao, K.; Chen, Q.; et al. Spatiotemporal variation, sources, and secondary transformation potential of volatile organic compounds in Xi'an, China. *Atmos. Chem. Phys.* **2021**, *21*, 4939–4958. <https://doi.org/10.5194/acp-21-4939-2021>.
- Liu, Y.; Shao, M.; Fu, L.; Lu, S.; Zeng, L.; Tang, D. Source profiles of volatile organic compounds (VOCs) measured in China: Part I. *Atmos. Environ.* **2008**, *42*, 6247–6260. <https://doi.org/10.1016/j.atmosenv.2008.01.070>.
- Yan, Y.; Yang, C.; Peng, L.; Li, R.; Bai, H. Emission characteristics of volatile organic compounds from coal-, coal, gangue-, and biomass-fired power plants in China. *Atmos. Environ.* **2016**, *143*, 261–269. <https://doi.org/10.1016/j.atmosenv.2016.08.052>.
- Xiong, C.; Wang, N.; Zhou, L.; Yang, F.; Qiu, Y.; Chen, J.; Han, L.; Li, J. Component characteristics and source apportionment of volatile organic compounds during summer and winter in downtown Chengdu, southwest China. *Atmos. Environ.* **2021**, *258*, 118485. <https://doi.org/10.1016/j.atmosenv.2021.118485>.
- Shao, P.; An, J.; Xin, J.; Wu, F.; Wang, J.; Ji, D.; Wang, Y. Source apportionment of VOCs and the contribution to photochemical ozone formation during summer in the typical industrial area in the Yangtze River Delta, China. *Atmos. Res.* **2016**, *176*, 64–74. <https://doi.org/10.1016/j.atmosres.2016.02.015>.
- Liu, Y.; Wang, H.; Jing, S.; Gao, Y.; Peng, Y.; Lou, S.; Cheng, T.; Tao, S.; Li, L.; Li, Y.; et al. Characteristics and sources of volatile organic compounds (VOCs) in Shanghai during summer: Implications of regional transport. *Atmos. Environ.* **2019**, *215*, 116902. <https://doi.org/10.1016/j.atmosenv.2019.116902>.

10. Chen, G.; Liu, T.; Ji, X.; Xu, K.; Hong, Y.; Xu, L.; Li, M.; Fan, X.; Chen, Y.; Yang, C.; et al. Source apportionment of VOCs and O<sub>3</sub> production sensitivity at coastal and inland sites of southeast China. *Aerosol Air Qual. Res.* **2022**, *22*, 220289. <https://doi.org/10.4209/aaqr.220289>.
11. Mo, Z.; Shao, M.; Lu, S. Compilation of a source profile database for hydrocarbon and OVOC emissions in China. *Atmos. Environ.* **2016**, *143*, 209–217. <https://doi.org/10.1016/j.atmosenv.2016.08.025>.
12. He, Z.; Wang, X.; Ling, Z.; Zhao, J.; Guo, H.; Shao, M.; Wang, Z. Contributions of different anthropogenic volatile organic compound sources to ozone formation at a receptor site in the Pearl River Delta region and its policy implications. *Atmos. Chem. Phys.* **2019**, *19*, 8801–8816. <https://doi.org/10.5194/acp-19-8801-2019>.
13. Sha, Q.; Zhu, M.; Huang, H.; Wang, Y.; Huang, Z.; Zhang, X.; Tang, M.; Lu, M.; Chen, C.; Shi, B.; et al. A newly integrated dataset of volatile organic compounds (VOCs) source profiles and implications for the future development of VOCs profiles in China. *Sci. Total Environ.* **2021**, *793*, 148348. <https://doi.org/10.1016/j.scitotenv.2021.148348>.
14. Li, Y.; Yin, S.; Yu, S.; Yuan, M.; Dong, Z.; Zhang, D.; Yang, L.; Zhang, R. Characteristics, source apportionment and health risks of ambient VOCs during high ozone period at an urban site in central plain, China. *Chemosphere* **2020**, *250*, 126283. <https://doi.org/10.1016/j.chemosphere.2020.126283>.
